# Supplementary material for: CRISPR-Cas immunity leads to a coevolutionary arms race between Streptococcus thermophilus and lytic phage
Source: PubMed Central journal article supplement (PMC6452269; doi:10.1098/rstb.2018.0098), 2019-03-25
Supplement: rstb20180098supp2.pdf [file rstb20180098supp2.pdf]

|            |    | Hosts (T1) |   |   |   |   |   |   |   |   |    |    |    | Hosts (T4) |   |   |   |   |   |   |   |   |    |    |    | Hosts (T9) |   |   |   |   |   |   |   |   |    |    |    |
|------------|----|------------|---|---|---|---|---|---|---|---|----|----|----|------------|---|---|---|---|---|---|---|---|----|----|----|------------|---|---|---|---|---|---|---|---|----|----|----|
|            |    | 1          | 2 | 3 | 4 | 5 | 6 | 7 | 8 | 9 | 10 | 11 | 12 | 1          | 2 | 3 | 4 | 5 | 6 | 7 | 8 | 9 | 10 | 11 | 12 | 1          | 2 | 3 | 4 | 5 | 6 | 7 | 8 | 9 | 10 | 11 | 12 |
| Phage (T1) | 1  | 1          | 1 | 1 | 1 | 1 | 1 | 1 | 1 | 1 | 1  | 1  | 1  | 0          | 0 | 0 | 0 | 0 | 0 | 0 | 0 | 0 | 0  | 0  | 0  | 0          | 0 | 0 | 0 | 0 | 0 | 0 | 0 | 0 | 0  | 0  | 0  |
|            | 2  | 1          | 1 | 1 | 1 | 1 | 1 | 1 | 1 | 1 | 1  | 1  | 1  | 0          | 0 | 0 | 0 | 0 | 0 | 0 | 0 | 0 | 0  | 0  | 0  | 0          | 0 | 0 | 0 | 0 | 0 | 0 | 0 | 0 | 0  | 0  | 0  |
|            | 3  | 1          | 1 | 1 | 1 | 1 | 1 | 1 | 1 | 1 | 1  | 1  | 1  | 0          | 0 | 0 | 0 | 0 | 0 | 0 | 0 | 0 | 0  | 0  | 0  | 0          | 0 | 0 | 0 | 0 | 0 | 0 | 0 | 0 | 0  | 0  | 0  |
|            | 4  | 1          | 1 | 1 | 1 | 1 | 1 | 1 | 1 | 1 | 1  | 1  | 1  | 0          | 0 | 0 | 0 | 0 | 0 | 0 | 0 | 0 | 0  | 0  | 0  | 0          | 0 | 0 | 0 | 0 | 0 | 0 | 0 | 0 | 0  | 0  | 0  |
|            | 5  | 1          | 0 | 0 | 1 | 1 | 0 | 0 | 0 | 0 | 0  | 1  | 1  | 0          | 0 | 0 | 0 | 0 | 0 | 0 | 0 | 0 | 0  | 0  | 0  | 0          | 0 | 0 | 0 | 0 | 0 | 0 | 0 | 0 | 0  | 0  | 0  |
|            | 6  | 1          | 1 | 1 | 1 | 1 | 1 | 1 | 1 | 1 | 1  | 1  | 1  | 0          | 0 | 0 | 0 | 0 | 0 | 0 | 0 | 0 | 0  | 0  | 0  | 0          | 0 | 0 | 0 | 0 | 0 | 0 | 0 | 0 | 0  | 0  | 0  |
|            | 7  | 1          | 0 | 1 | 1 | 0 | 0 | 0 | 1 | 0 | 1  | 1  | 0  | 0          | 0 | 0 | 0 | 0 | 0 | 0 | 0 | 0 | 0  | 0  | 0  | 0          | 0 | 0 | 0 | 0 | 0 | 0 | 0 | 0 | 0  | 0  | 0  |
|            | 8  | 1          | 0 | 0 | 1 | 0 | 0 | 0 | 1 | 1 | 0  | 1  | 0  | 0          | 0 | 0 | 0 | 0 | 0 | 0 | 0 | 0 | 0  | 0  | 0  | 0          | 0 | 0 | 0 | 0 | 0 | 0 | 0 | 0 | 0  | 0  | 0  |
|            | 9  | 1          | 1 | 1 | 1 | 1 | 1 | 1 | 1 | 1 | 0  | 1  | 1  | 0          | 0 | 0 | 0 | 0 | 0 | 0 | 0 | 0 | 0  | 0  | 0  | 0          | 0 | 0 | 0 | 0 | 0 | 0 | 0 | 0 | 0  | 0  | 0  |
|            | 10 | 1          | 1 | 1 | 1 | 1 | 1 | 1 | 1 | 1 | 1  | 1  | 1  | 0          | 0 | 0 | 0 | 0 | 0 | 0 | 0 | 0 | 0  | 0  | 0  | 0          | 0 | 0 | 0 | 0 | 0 | 0 | 0 | 0 | 0  | 0  | 0  |
|            | 11 | 1          | 1 | 0 | 1 | 0 | 0 | 0 | 1 | 0 | 1  | 0  | 0  | 0          | 0 | 0 | 0 | 0 | 0 | 0 | 0 | 0 | 0  | 0  | 0  | 0          | 0 | 0 | 0 | 0 | 0 | 0 | 0 | 0 | 0  | 0  | 0  |
|            | 12 | 1          | 1 | 0 | 1 | 0 | 0 | 0 | 1 | 0 | 1  | 0  | 0  | 0          | 0 | 0 | 0 | 0 | 0 | 0 | 0 | 0 | 0  | 0  | 0  | 0          | 0 | 0 | 0 | 0 | 0 | 0 | 0 | 0 | 0  | 0  | 0  |
| Phage (T4) | 1  | 1          | 1 | 1 | 1 | 1 | 1 | 1 | 1 | 1 | 1  | 1  | 1  | 1          | 1 | 1 | 1 | 1 | 1 | 1 | 1 | 1 | 1  | 1  | 0  | 0          | 0 | 0 | 0 | 0 | 0 | 0 | 0 | 0 | 0  | 0  |    |
|            | 2  | 1          | 1 | 1 | 1 | 1 | 1 | 1 | 1 | 1 | 1  | 1  | 1  | 1          | 1 | 1 | 1 | 1 | 1 | 1 | 1 | 1 | 1  | 1  | 0  | 0          | 0 | 0 | 0 | 0 | 0 | 0 | 0 | 0 | 0  | 0  |    |
|            | 3  | 1          | 1 | 1 | 1 | 1 | 1 | 1 | 1 | 1 | 1  | 1  | 1  | 1          | 1 | 1 | 1 | 1 | 1 | 1 | 1 | 1 | 1  | 1  | 0  | 0          | 0 | 0 | 0 | 0 | 0 | 0 | 0 | 0 | 0  | 0  |    |
|            | 4  | 1          | 1 | 1 | 1 | 1 | 1 | 1 | 1 | 1 | 1  | 1  | 1  | 1          | 1 | 1 | 1 | 1 | 1 | 1 | 1 | 1 | 1  | 1  | 0  | 1          | 0 | 0 | 0 | 0 | 0 | 0 | 0 | 0 | 0  | 0  |    |
|            | 5  | 1          | 1 | 1 | 1 | 1 | 1 | 1 | 1 | 1 | 1  | 1  | 1  | 1          | 1 | 1 | 1 | 1 | 1 | 1 | 1 | 1 | 1  | 1  | 0  | 0          | 0 | 0 | 0 | 0 | 0 | 0 | 0 | 1 | 1  | 1  |    |
|            | 6  | 1          | 1 | 1 | 1 | 1 | 1 | 1 | 1 | 1 | 1  | 1  | 1  | 1          | 1 | 1 | 1 | 1 | 1 | 1 | 1 | 1 | 1  | 1  | 0  | 0          | 0 | 0 | 0 | 0 | 0 | 0 | 0 | 0 | 0  | 0  |    |
|            | 7  | 1          | 1 | 1 | 1 | 1 | 1 | 1 | 1 | 1 | 1  | 1  | 1  | 1          | 1 | 1 | 1 | 1 | 1 | 1 | 1 | 1 | 1  | 1  | 0  | 0          | 0 | 0 | 0 | 0 | 0 | 0 | 0 | 0 | 0  | 0  |    |
|            | 8  | 1          | 1 | 1 | 1 | 1 | 1 | 1 | 1 | 1 | 1  | 1  | 1  | 1          | 1 | 1 | 1 | 1 | 1 | 1 | 1 | 1 | 1  | 1  | 0  | 0          | 0 | 0 | 0 | 0 | 0 | 0 | 0 | 0 | 0  | 0  |    |
|            | 9  | 1          | 1 | 1 | 1 | 1 | 1 | 1 | 1 | 1 | 1  | 1  | 1  | 1          | 1 | 1 | 1 | 1 | 1 | 1 | 1 | 1 | 1  | 1  | 0  | 0          | 0 | 0 | 0 | 0 | 0 | 0 | 0 | 0 | 0  | 0  |    |
|            | 10 | 1          | 1 | 1 | 1 | 1 | 1 | 1 | 1 | 1 | 1  | 1  | 1  | 1          | 1 | 1 | 1 | 1 | 1 | 1 | 1 | 1 | 1  | 1  | 0  | 0          | 0 | 0 | 0 | 0 | 0 | 0 | 0 | 0 | 0  | 0  |    |
|            | 11 | 1          | 1 | 1 | 1 | 1 | 1 | 1 | 1 | 1 | 1  | 1  | 1  | 1          | 1 | 0 | 1 | 1 | 0 | 0 | 0 | 0 | 0  | 1  | 0  | 0          | 0 | 0 | 0 | 0 | 0 | 0 | 0 | 0 | 0  | 0  |    |
|            | 12 | 1          | 1 | 1 | 1 | 1 | 1 | 1 | 1 | 1 | 1  | 1  | 1  | 1          | 1 | 0 | 1 | 1 | 0 | 0 | 0 | 0 | 0  | 1  | 0  | 0          | 0 | 0 | 0 | 0 | 0 | 0 | 0 | 0 | 0  | 0  |    |
| Phage (T9) | 1  | 0          | 0 | 0 | 0 | 0 | 0 | 0 | 0 | 0 | 0  | 0  | 1  | 1          | 1 | 1 | 1 | 1 | 1 | 1 | 1 | 1 | 1  | 1  | 1  | 1          | 1 | 1 | 1 | 1 | 1 | 1 | 1 | 1 | 0  | 1  |    |
|            | 2  | 0          | 0 | 0 | 0 | 0 | 0 | 0 | 0 | 0 | 0  | 0  | 1  | 1          | 1 | 1 | 1 | 1 | 1 | 1 | 1 | 1 | 1  | 1  | 1  | 1          | 1 | 1 | 1 | 0 | 0 | 0 | 0 | 0 | 0  | 0  |    |
|            | 3  | 0          | 0 | 0 | 0 | 0 | 0 | 0 | 0 | 0 | 0  | 0  | 1  | 1          | 1 | 1 | 1 | 1 | 1 | 1 | 1 | 1 | 1  | 1  | 1  | 0          | 0 | 0 | 0 | 0 | 0 | 0 | 0 | 0 | 0  | 0  |    |
|            | 4  | 0          | 0 | 0 | 0 | 0 | 0 | 0 | 0 | 0 | 0  | 0  | 1  | 1          | 1 | 1 | 1 | 1 | 1 | 1 | 1 | 1 | 1  | 1  | 1  | 0          | 0 | 0 | 0 | 0 | 0 | 0 | 0 | 0 | 0  | 0  |    |
|            | 5  | 0          | 0 | 0 | 1 | 0 | 0 | 0 | 0 | 0 | 0  | 0  | 1  | 1          | 1 | 1 | 1 | 1 | 1 | 1 | 1 | 1 | 1  | 1  | 0  | 0          | 0 | 0 | 0 | 0 | 0 | 0 | 0 | 0 | 0  | 0  |    |
|            | 6  | 0          | 0 | 0 | 0 | 0 | 0 | 0 | 0 | 0 | 0  | 0  | 1  | 1          | 1 | 1 | 1 | 1 | 1 | 1 | 1 | 1 | 1  | 1  | 0  | 0          | 0 | 0 | 0 | 0 | 0 | 0 | 0 | 0 | 0  | 0  |    |
|            | 7  | 0          | 0 | 0 | 0 | 0 | 0 | 0 | 0 | 0 | 0  | 0  | 1  | 1          | 1 | 1 | 1 | 1 | 1 | 1 | 1 | 1 | 1  | 1  | 0  | 0          | 0 | 0 | 0 | 0 | 0 | 0 | 0 | 0 | 0  | 0  |    |
|            | 8  | 0          | 0 | 0 | 0 | 0 | 0 | 0 | 0 | 0 | 0  | 0  | 0  | 0          | 0 | 0 | 0 | 0 | 0 | 0 | 0 | 0 | 0  | 0  | 0  | 0          | 0 | 0 | 0 | 0 | 0 | 0 | 0 | 0 | 0  | 0  |    |
|            | 9  | 0          | 0 | 0 | 0 | 0 | 0 | 0 | 0 | 0 | 0  | 0  | 0  | 0          | 0 | 0 | 0 | 0 | 0 | 0 | 0 | 0 | 0  | 0  | 0  | 0          | 0 | 0 | 0 | 0 | 0 | 0 | 0 | 0 | 0  | 0  |    |
|            | 10 | 0          | 0 | 0 | 0 | 0 | 0 | 0 | 0 | 0 | 0  | 0  | 0  | 0          | 0 | 0 | 0 | 0 | 0 | 0 | 0 | 0 | 0  | 0  | 0  | 0          | 0 | 0 | 0 | 0 | 0 | 0 | 0 | 0 | 0  | 0  |    |
|            | 11 | 0          | 0 | 0 | 0 | 0 | 0 | 0 | 0 | 0 | 0  | 0  | 0  | 0          | 1 | 0 | 1 | 1 | 0 | 0 | 0 | 0 | 0  | 0  | 0  | 0          | 0 | 0 | 0 | 1 | 0 | 1 | 1 | 0 | 0  | 0  |    |
|            | 12 | 0          | 0 | 0 | 0 | 0 | 0 | 0 | 0 | 0 | 0  | 0  | 0  | 0          | 1 | 0 | 1 | 1 | 0 | 0 | 0 | 0 | 0  | 0  | 0  | 0          | 0 | 0 | 0 | 1 | 0 | 1 | 1 | 0 | 0  | 1  |    |

Replicate 2

|            |    | Hosts (T1) |   |   |   |   |   |   |   |   |    |    |    | Hosts (T4) |   |   |   |   |   |   |   |   |    |    |    | Hosts (T9) |   |   |   |   |   |   |   |   |    |    |    |
|------------|----|------------|---|---|---|---|---|---|---|---|----|----|----|------------|---|---|---|---|---|---|---|---|----|----|----|------------|---|---|---|---|---|---|---|---|----|----|----|
|            |    | 1          | 2 | 3 | 4 | 5 | 6 | 7 | 8 | 9 | 10 | 11 | 12 | 1          | 2 | 3 | 4 | 5 | 6 | 7 | 8 | 9 | 10 | 11 | 12 | 1          | 2 | 3 | 4 | 5 | 6 | 7 | 8 | 9 | 10 | 11 | 12 |
| Phage (T1) | 1  | 1          | 1 | 1 | 1 | 1 | 1 | 1 | 1 | 1 | 1  | 1  | 1  | 1          | 0 | 0 | 0 | 0 | 0 | 0 | 0 | 0 | 0  | 0  | 0  | 0          | 0 | 0 | 0 | 0 | 0 | 0 | 0 | 0 | 0  | 0  | 0  |
|            | 2  | 1          | 1 | 1 | 1 | 1 | 1 | 1 | 1 | 1 | 1  | 1  | 1  | 1          | 0 | 0 | 0 | 0 | 0 | 0 | 0 | 0 | 0  | 0  | 0  | 0          | 0 | 0 | 0 | 0 | 0 | 0 | 0 | 0 | 0  | 0  | 0  |
|            | 3  | 1          | 1 | 1 | 1 | 1 | 1 | 1 | 1 | 1 | 1  | 1  | 1  | 0          | 0 | 0 | 0 | 0 | 0 | 0 | 0 | 0 | 0  | 0  | 0  | 0          | 0 | 0 | 0 | 0 | 0 | 0 | 0 | 0 | 0  | 0  | 0  |
|            | 4  | 1          | 1 | 1 | 1 | 1 | 1 | 1 | 1 | 1 | 1  | 1  | 1  | 1          | 0 | 0 | 0 | 0 | 0 | 0 | 0 | 0 | 0  | 0  | 0  | 0          | 0 | 0 | 0 | 0 | 0 | 0 | 0 | 0 | 0  | 0  | 0  |
|            | 5  | 1          | 1 | 1 | 1 | 1 | 1 | 1 | 1 | 1 | 1  | 1  | 1  | 0          | 0 | 0 | 0 | 0 | 0 | 0 | 0 | 0 | 0  | 0  | 0  | 0          | 0 | 0 | 0 | 0 | 0 | 0 | 0 | 0 | 0  | 0  | 0  |
|            | 6  | 1          | 1 | 1 | 1 | 1 | 1 | 1 | 1 | 1 | 1  | 1  | 1  | 0          | 0 | 0 | 0 | 0 | 0 | 0 | 0 | 0 | 0  | 0  | 0  | 0          | 0 | 0 | 0 | 0 | 0 | 0 | 0 | 0 | 0  | 0  | 0  |
|            | 7  | 1          | 1 | 1 | 1 | 1 | 1 | 1 | 1 | 1 | 1  | 1  | 1  | 0          | 0 | 0 | 0 | 0 | 0 | 0 | 0 | 0 | 0  | 0  | 0  | 0          | 0 | 0 | 0 | 0 | 0 | 0 | 0 | 0 | 0  | 0  | 0  |
|            | 8  | 1          | 1 | 1 | 1 | 1 | 1 | 1 | 1 | 1 | 1  | 1  | 1  | 0          | 0 | 0 | 0 | 0 | 0 | 0 | 0 | 0 | 0  | 0  | 0  | 0          | 0 | 0 | 0 | 0 | 0 | 0 | 0 | 0 | 0  | 0  | 0  |
|            | 9  | 1          | 1 | 1 | 1 | 1 | 1 | 1 | 1 | 1 | 1  | 1  | 1  | 0          | 0 | 0 | 0 | 0 | 0 | 0 | 0 | 0 | 0  | 0  | 0  | 0          | 0 | 0 | 0 | 0 | 0 | 0 | 0 | 0 | 0  | 0  | 0  |
|            | 10 | 1          | 1 | 1 | 1 | 1 | 1 | 1 | 1 | 1 | 1  | 1  | 1  | 1          | 0 | 0 | 0 | 0 | 0 | 0 | 0 | 0 | 0  | 0  | 0  | 0          | 0 | 0 | 0 | 0 | 0 | 0 | 0 | 0 | 0  | 0  | 0  |
|            | 11 | 1          | 1 | 1 | 1 | 1 | 1 | 1 | 1 | 1 | 1  | 1  | 1  | 0          | 0 | 0 | 0 | 0 | 0 | 0 | 0 | 0 | 0  | 0  | 0  | 0          | 0 | 0 | 0 | 0 | 0 | 0 | 0 | 0 | 0  | 0  | 0  |
|            | 12 | 1          | 1 | 1 | 1 | 1 | 1 | 1 | 1 | 1 | 1  | 1  | 1  | 0          | 0 | 0 | 0 | 0 | 0 | 0 | 0 | 0 | 0  | 0  | 0  | 0          | 0 | 0 | 0 | 0 | 0 | 0 | 0 | 0 | 0  | 0  | 0  |
| Phage (T4) | 1  | 0          | 0 | 0 | 0 | 0 | 0 | 0 | 0 | 0 | 0  | 1  | 0  | 0          | 0 | 0 | 0 | 0 | 0 | 0 | 0 | 0 | 0  | 0  | 0  | 0          | 0 | 0 | 0 | 0 | 0 | 0 | 0 | 0 | 0  | 0  |    |
|            | 2  | 0          | 0 | 0 | 0 | 0 | 0 | 0 | 0 | 0 | 0  | 0  | 0  | 0          | 0 | 0 | 0 | 0 | 0 | 0 | 0 | 0 | 0  | 0  | 0  | 0          | 0 | 0 | 0 | 0 | 0 | 0 | 0 | 0 | 0  | 0  |    |
|            | 3  | 0          | 0 | 0 | 0 | 0 | 1 | 0 | 0 | 0 | 0  | 1  | 1  | 0          | 0 | 0 | 0 | 0 | 0 | 0 | 0 | 0 | 0  | 0  | 0  | 0          | 0 | 0 | 0 | 0 | 0 | 0 | 0 | 0 | 0  | 0  | 0  |
|            | 4  | 0          | 0 | 1 | 0 | 0 | 0 | 0 | 0 | 0 | 0  | 0  | 0  | 0          | 0 | 0 | 0 | 0 | 0 | 0 | 0 | 0 | 0  | 0  | 0  | 0          | 0 | 0 | 0 | 0 | 0 | 0 | 0 | 0 | 0  | 0  | 0  |
|            | 5  | 0          | 0 | 0 | 0 | 0 | 0 | 0 | 0 | 0 | 0  | 0  | 1  | 0          | 0 | 0 | 0 | 0 | 0 | 0 | 0 | 0 | 0  | 0  | 0  | 0          | 0 | 0 | 0 | 0 | 0 | 0 | 0 | 0 | 0  | 0  | 0  |
|            | 6  | 0          | 0 | 0 | 0 | 0 | 0 | 1 | 0 | 0 | 0  | 0  | 1  | 1          | 0 | 0 | 0 | 0 | 0 | 0 | 0 | 0 | 0  | 0  | 0  | 0          | 0 | 0 | 0 | 0 | 0 | 0 | 0 | 0 | 0  | 0  | 0  |
|            | 7  | 1          | 1 | 1 | 1 | 1 | 1 | 1 | 1 | 1 | 1  | 1  | 1  | 1          | 0 | 0 | 0 | 0 | 0 | 0 | 0 | 0 | 0  | 0  | 0  | 0          | 0 | 0 | 0 | 0 | 0 | 0 | 0 | 0 | 0  | 0  | 0  |
|            | 8  | 1          | 1 | 1 | 1 | 1 | 1 | 1 | 1 | 1 | 1  | 1  | 1  | 0          | 0 | 0 | 0 | 0 | 0 | 0 | 0 | 0 | 0  | 0  | 0  | 0          | 0 | 0 | 0 | 0 | 0 | 0 | 0 | 0 | 0  | 0  | 0  |
|            | 9  | 1          | 0 | 0 | 0 | 0 | 0 | 0 | 0 | 0 | 0  | 0  | 1  | 0          | 0 | 0 | 0 | 0 | 0 | 0 | 0 | 0 | 0  | 0  | 0  | 0          | 0 | 0 | 0 | 0 | 0 | 0 | 0 | 0 | 0  | 0  | 0  |
|            | 10 | 0          | 0 | 0 | 0 | 0 | 1 | 0 | 0 | 0 | 0  | 0  | 1  | 0          | 0 | 0 | 0 | 0 | 0 | 0 | 0 | 0 | 0  | 0  | 0  | 0          | 0 | 0 | 0 | 0 | 0 | 0 | 0 | 0 | 0  | 0  | 0  |
|            | 11 | 0          | 0 | 1 | 0 | 0 | 0 | 0 | 0 | 0 | 0  | 0  | 0  | 0          | 0 | 0 | 0 | 0 | 0 | 0 | 0 | 0 | 0  | 0  | 0  | 0          | 0 | 0 | 0 | 0 | 0 | 0 | 0 | 0 | 0  | 0  | 0  |
|            | 12 | 0          | 0 | 0 | 0 | 0 | 0 | 0 | 0 | 0 | 0  | 0  | 0  | 0          | 0 | 0 | 0 | 0 | 0 | 0 | 0 | 0 | 0  | 0  | 0  | 0          | 0 | 0 | 0 | 0 | 0 | 0 | 0 | 0 | 0  | 0  | 0  |
| Phage (T9) | 1  | 1          | 0 | 0 | 0 | 0 | 1 | 0 | 0 | 0 | 0  | 0  | 1  | 0          | 0 | 0 | 0 | 0 | 0 | 1 | 0 | 0 | 0  | 0  | 0  | 0          | 0 | 0 | 0 | 0 | 0 | 0 | 0 | 0 | 0  | 0  |    |
|            | 2  | 1          | 1 | 1 | 1 | 1 | 1 | 1 | 1 | 1 | 1  | 1  | 1  | 0          | 0 | 0 | 0 | 0 | 0 | 1 | 0 | 0 | 0  | 0  | 0  | 0          | 0 | 0 | 0 | 1 | 0 | 0 | 0 | 0 | 0  | 0  |    |
|            | 3  | 1          | 1 | 1 | 1 | 1 | 1 | 1 | 1 | 1 | 1  | 1  | 1  | 1          | 0 | 0 | 0 | 0 | 0 | 0 | 0 | 0 | 0  | 0  | 0  | 0          | 0 | 0 | 0 | 0 | 0 | 0 | 0 | 0 | 0  | 0  |    |
|            | 4  | 0          | 0 | 1 | 0 | 0 | 1 | 0 | 0 | 0 | 0  | 0  | 0  | 1          | 0 | 0 | 0 | 0 | 0 | 0 | 0 | 0 | 0  | 0  | 0  | 0          | 0 | 0 | 0 | 0 | 0 | 0 | 0 | 0 | 0  | 0  | 0  |
|            | 5  | 1          | 1 | 1 | 1 | 1 | 1 | 1 | 1 | 1 | 1  | 1  | 1  | 0          | 0 | 0 | 0 | 0 | 0 | 0 | 0 | 0 | 0  | 0  | 0  | 0          | 0 | 0 | 0 | 0 | 0 | 0 | 0 | 0 | 0  | 0  |    |
|            | 6  | 1          | 1 | 1 | 1 | 1 | 1 | 1 | 1 | 1 | 1  | 1  | 1  | 0          | 0 | 0 | 0 | 0 | 0 | 0 | 0 | 0 | 0  | 0  | 0  | 0          | 0 | 0 | 0 | 0 | 0 | 0 | 0 | 0 | 0  | 0  |    |
|            | 7  | 1          | 1 | 1 | 1 | 1 | 1 | 1 | 1 | 1 | 1  | 1  | 1  | 0          | 0 | 0 | 0 | 0 | 0 | 0 | 0 | 0 | 0  | 0  | 0  | 0          | 0 | 0 | 0 | 0 | 0 | 0 | 0 | 0 | 0  | 0  |    |
|            | 8  | 1          | 1 | 1 | 1 | 1 | 1 | 1 | 1 | 1 | 1  | 1  | 1  | 0          | 0 | 0 | 0 | 0 | 0 | 0 | 0 | 0 | 0  | 0  | 0  | 0          | 0 | 0 | 0 | 0 | 0 | 0 | 0 | 0 | 0  | 0  |    |
|            | 9  | 1          | 1 | 1 | 1 | 1 | 1 | 1 | 1 | 1 | 1  | 1  | 1  | 0          | 0 | 0 | 0 | 0 | 1 | 1 | 0 | 1 | 0  | 0  | 1  | 0          | 1 | 1 | 1 | 1 | 1 | 1 | 0 | 1 | 0  | 1  | 1  |
|            | 10 | 1          | 1 | 1 | 1 | 1 | 1 | 1 | 1 | 1 | 1  | 1  | 1  | 1          | 0 | 0 | 0 | 0 | 0 | 0 | 0 | 0 | 0  | 0  | 0  | 0          | 0 | 0 | 0 | 0 | 0 | 0 | 0 | 0 | 0  | 0  | 0  |
|            | 11 | 1          | 1 | 1 | 1 | 1 | 1 | 1 | 1 | 1 | 1  | 1  | 1  | 0          | 0 | 0 | 0 | 0 | 1 | 1 | 0 | 1 | 0  | 0  | 1  | 0          | 0 | 0 | 0 | 0 | 1 | 0 | 0 | 0 | 0  | 0  | 0  |
|            | 12 | 1          | 1 | 1 | 1 | 1 | 1 | 1 | 1 | 1 | 1  | 1  | 1  | 0          | 0 | 0 | 0 | 0 | 0 | 0 | 0 | 1 | 0  | 0  | 0  | 0          | 0 | 0 | 0 | 0 | 0 | 0 | 0 | 0 | 0  | 0  | 0  |

Replicate 3

|            |    | Hosts (T1) |   |   |   |   |   |   |   |   |    |    |    | Hosts (T4) |   |   |   |   |   |   |   |   |    |    |    | Hosts (T9) |   |   |   |   |   |   |   |   |    |    |    |   |
|------------|----|------------|---|---|---|---|---|---|---|---|----|----|----|------------|---|---|---|---|---|---|---|---|----|----|----|------------|---|---|---|---|---|---|---|---|----|----|----|---|
|            |    | 1          | 2 | 3 | 4 | 5 | 6 | 7 | 8 | 9 | 10 | 11 | 12 | 1          | 2 | 3 | 4 | 5 | 6 | 7 | 8 | 9 | 10 | 11 | 12 | 1          | 2 | 3 | 4 | 5 | 6 | 7 | 8 | 9 | 10 | 11 | 12 |   |
| Phage (T1) | 1  | 1          | 0 | 1 | 1 | 1 | 1 | 1 | 1 | 1 | 1  | 1  | 1  | 0          | 0 | 0 | 0 | 0 | 0 | 0 | 0 | 0 | 0  | 0  | 0  | 0          | 0 | 0 | 0 | 0 | 0 | 0 | 0 | 0 | 0  | 0  | 0  |   |
|            | 2  | 1          | 0 | 1 | 1 | 1 | 1 | 1 | 1 | 1 | 1  | 1  | 1  | 0          | 0 | 0 | 0 | 0 | 0 | 0 | 0 | 0 | 0  | 0  | 0  | 0          | 0 | 0 | 0 | 0 | 0 | 0 | 0 | 0 | 0  | 0  | 0  |   |
|            | 3  | 1          | 0 | 1 | 1 | 1 | 1 | 1 | 1 | 1 | 1  | 1  | 1  | 0          | 0 | 0 | 0 | 0 | 0 | 0 | 0 | 0 | 0  | 0  | 0  | 0          | 0 | 0 | 0 | 0 | 0 | 0 | 0 | 0 | 0  | 0  | 0  |   |
|            | 4  | 1          | 0 | 1 | 1 | 1 | 1 | 1 | 1 | 1 | 1  | 1  | 1  | 0          | 0 | 0 | 0 | 0 | 0 | 0 | 0 | 0 | 0  | 0  | 0  | 0          | 0 | 0 | 0 | 0 | 0 | 0 | 0 | 0 | 0  | 0  | 0  |   |
|            | 5  | 1          | 0 | 1 | 1 | 1 | 1 | 1 | 1 | 1 | 1  | 1  | 1  | 0          | 0 | 0 | 0 | 0 | 0 | 0 | 0 | 0 | 0  | 0  | 0  | 0          | 0 | 0 | 0 | 0 | 0 | 0 | 0 | 0 | 0  | 0  | 0  |   |
|            | 6  | 1          | 0 | 1 | 1 | 1 | 1 | 1 | 1 | 1 | 1  | 1  | 1  | 0          | 0 | 0 | 0 | 0 | 0 | 0 | 0 | 0 | 0  | 0  | 0  | 0          | 0 | 0 | 0 | 0 | 0 | 0 | 0 | 0 | 0  | 0  | 0  |   |
|            | 7  | 1          | 0 | 1 | 1 | 1 | 1 | 1 | 1 | 1 | 1  | 1  | 1  | 0          | 0 | 0 | 0 | 0 | 0 | 0 | 0 | 0 | 0  | 0  | 0  | 0          | 0 | 0 | 0 | 0 | 0 | 0 | 0 | 0 | 0  | 0  | 0  |   |
|            | 8  | 1          | 0 | 1 | 1 | 1 | 1 | 1 | 1 | 1 | 1  | 1  | 1  | 0          | 0 | 0 | 0 | 0 | 0 | 0 | 0 | 0 | 0  | 0  | 0  | 0          | 0 | 0 | 0 | 0 | 0 | 0 | 0 | 0 | 0  | 0  | 0  |   |
|            | 9  | 1          | 0 | 1 | 1 | 1 | 1 | 1 | 1 | 1 | 1  | 1  | 1  | 0          | 0 | 0 | 0 | 0 | 0 | 0 | 0 | 0 | 0  | 0  | 0  | 0          | 0 | 0 | 0 | 0 | 0 | 0 | 0 | 0 | 0  | 0  | 0  |   |
|            | 10 | 1          | 0 | 1 | 1 | 1 | 1 | 1 | 1 | 1 | 1  | 1  | 1  | 0          | 0 | 0 | 0 | 0 | 0 | 0 | 0 | 0 | 0  | 0  | 0  | 0          | 0 | 0 | 0 | 0 | 0 | 0 | 0 | 0 | 0  | 0  | 0  |   |
|            | 11 | 1          | 0 | 1 | 1 | 1 | 1 | 1 | 1 | 1 | 1  | 1  | 1  | 0          | 0 | 0 | 0 | 0 | 0 | 0 | 0 | 0 | 0  | 0  | 0  | 0          | 0 | 0 | 0 | 0 | 0 | 0 | 0 | 0 | 0  | 0  | 0  |   |
|            | 12 | 1          | 0 | 1 | 1 | 1 | 1 | 1 | 1 | 1 | 1  | 1  | 1  | 0          | 0 | 0 | 0 | 0 | 0 | 0 | 0 | 0 | 0  | 0  | 0  | 0          | 0 | 0 | 0 | 0 | 0 | 0 | 0 | 0 | 0  | 0  | 0  |   |
| Phage (T4) | 1  | 0          | 0 | 0 | 0 | 0 | 0 | 0 | 0 | 0 | 0  | 0  | 0  | 0          | 0 | 0 | 0 | 0 | 0 | 0 | 0 | 0 | 0  | 0  | 0  | 0          | 0 | 0 | 0 | 0 | 0 | 0 | 0 | 0 | 0  |    |    |   |
|            | 2  | 0          | 0 | 0 | 0 | 0 | 0 | 0 | 0 | 0 | 0  | 0  | 0  | 0          | 0 | 0 | 0 | 0 | 0 | 0 | 0 | 0 | 0  | 0  | 0  | 0          | 0 | 0 | 0 | 0 | 0 | 0 | 0 | 0 | 0  |    |    |   |
|            | 3  | 0          | 0 | 0 | 0 | 0 | 0 | 0 | 0 | 0 | 0  | 0  | 0  | 0          | 0 | 0 | 0 | 0 | 0 | 0 | 0 | 0 | 0  | 0  | 0  | 0          | 0 | 0 | 0 | 0 | 0 | 0 | 0 | 0 | 0  |    |    |   |
|            | 4  | 0          | 0 | 0 | 0 | 0 | 0 | 0 | 0 | 0 | 0  | 0  | 0  | 0          | 0 | 0 | 0 | 0 | 0 | 0 | 0 | 0 | 0  | 0  | 0  | 0          | 0 | 0 | 0 | 0 | 0 | 0 | 0 | 0 | 0  |    |    |   |
|            | 5  | 0          | 0 | 0 | 0 | 0 | 1 | 0 | 0 | 0 | 0  | 0  | 0  | 0          | 0 | 0 | 0 | 0 | 0 | 0 | 0 | 0 | 0  | 0  | 0  | 0          | 0 | 0 | 0 | 0 | 0 | 0 | 0 | 0 | 0  |    |    |   |
|            | 6  | 1          | 0 | 0 | 0 | 0 | 0 | 0 | 0 | 0 | 0  | 0  | 0  | 0          | 0 | 0 | 0 | 0 | 0 | 0 | 0 | 0 | 0  | 0  | 0  | 0          | 0 | 0 | 0 | 0 | 0 | 0 | 0 | 0 | 0  |    |    |   |
|            | 7  | 0          | 0 | 0 | 0 | 0 | 0 | 0 | 0 | 0 | 0  | 0  | 0  | 0          | 0 | 0 | 0 | 0 | 0 | 0 | 0 | 0 | 0  | 0  | 0  | 0          | 0 | 0 | 0 | 0 | 0 | 0 | 0 | 0 | 0  |    |    |   |
|            | 8  | 0          | 0 | 0 | 0 | 0 | 0 | 0 | 0 | 0 | 0  | 0  | 0  | 0          | 0 | 0 | 0 | 0 | 0 | 0 | 0 | 0 | 0  | 0  | 0  | 0          | 0 | 0 | 0 | 0 | 0 | 0 | 0 | 0 | 0  |    |    |   |
|            | 9  | 0          | 0 | 0 | 1 | 1 | 1 | 0 | 0 | 0 | 0  | 0  | 0  | 0          | 0 | 0 | 0 | 0 | 0 | 0 | 0 | 0 | 0  | 0  | 0  | 0          | 0 | 0 | 0 | 0 | 0 | 0 | 0 | 0 | 0  |    |    |   |
|            | 10 | 0          | 0 | 0 | 0 | 0 | 0 | 0 | 0 | 0 | 0  | 0  | 0  | 0          | 0 | 0 | 0 | 0 | 0 | 0 | 0 | 0 | 0  | 0  | 0  | 0          | 0 | 0 | 0 | 0 | 0 | 0 | 0 | 0 | 0  |    |    |   |
|            | 11 | 0          | 0 | 0 | 0 | 0 | 0 | 0 | 0 | 0 | 0  | 0  | 0  | 0          | 0 | 0 | 0 | 0 | 0 | 0 | 0 | 0 | 0  | 0  | 0  | 0          | 0 | 0 | 0 | 0 | 0 | 0 | 0 | 0 | 0  |    |    |   |
|            | 12 | 1          | 0 | 1 | 1 | 1 | 1 | 1 | 1 | 1 | 1  | 1  | 0  | 0          | 0 | 0 | 0 | 0 | 0 | 0 | 0 | 0 | 0  | 0  | 0  | 0          | 0 | 0 | 0 | 0 | 0 | 0 | 0 | 0 | 0  |    |    |   |
| Phage (T9) | 1  | 0          | 0 | 0 | 0 | 0 | 1 | 0 | 0 | 1 | 0  | 1  | 0  | 1          | 1 | 1 | 1 | 1 | 1 | 1 | 1 | 1 | 1  | 1  | 1  | 1          | 0 | 0 | 1 | 1 | 0 | 1 | 1 | 1 | 1  | 1  | 1  |   |
|            | 2  | 1          | 0 | 1 | 0 | 0 | 1 | 1 | 0 | 1 | 0  | 1  | 1  | 0          | 0 | 0 | 0 | 1 | 1 | 0 | 1 | 1 | 0  | 0  | 1  | 1          | 0 | 1 | 1 | 1 | 0 | 1 | 1 | 1 | 1  | 1  | 1  |   |
|            | 3  | 1          | 0 | 1 | 0 | 0 | 1 | 1 | 0 | 0 | 0  | 0  | 1  | 1          | 0 | 0 | 1 | 0 | 1 | 0 | 0 | 1 | 1  | 0  | 0  | 1          | 1 | 0 | 1 | 1 | 1 | 0 | 1 | 1 | 1  | 1  | 1  | 1 |
|            | 4  | 0          | 0 | 1 | 0 | 0 | 0 | 1 | 0 | 0 | 0  | 0  | 0  | 0          | 0 | 0 | 0 | 1 | 0 | 0 | 0 | 1 | 0  | 0  | 1  | 0          | 0 | 1 | 0 | 0 | 0 | 0 | 0 | 0 | 0  | 0  | 0  |   |
|            | 5  | 1          | 0 | 1 | 0 | 1 | 1 | 1 | 1 | 1 | 1  | 1  | 1  | 0          | 0 | 0 | 0 | 1 | 1 | 0 | 0 | 0 | 1  | 0  | 1  | 0          | 0 | 1 | 1 | 1 | 0 | 1 | 1 | 1 | 1  | 1  | 1  |   |
|            | 6  | 0          | 0 | 0 | 1 | 0 | 0 | 0 | 0 | 0 | 0  | 0  | 0  | 0          | 0 | 0 | 0 | 1 | 0 | 0 | 0 | 0 | 0  | 0  | 0  | 0          | 0 | 0 | 0 | 0 | 0 | 0 | 0 | 0 | 0  | 0  | 1  | 0 |
|            | 7  | 0          | 0 | 0 | 1 | 0 | 0 | 0 | 0 | 0 | 0  | 0  | 1  | 1          | 1 | 1 | 1 | 0 | 1 | 1 | 1 | 1 | 1  | 1  | 1  | 1          | 0 | 0 | 0 | 1 | 0 | 1 | 1 | 1 | 1  | 1  | 1  | 0 |
|            | 8  | 1          | 0 | 1 | 0 | 1 | 1 | 1 | 1 | 1 | 1  | 1  | 1  | 1          | 1 | 1 | 1 | 1 | 1 | 1 | 1 | 0 | 0  | 1  | 1  | 0          | 0 | 1 | 1 | 1 | 1 | 1 | 1 | 1 | 1  | 1  | 1  | 1 |
|            | 9  | 0          | 0 | 0 | 0 | 0 | 0 | 0 | 0 | 0 | 0  | 0  | 0  | 1          | 1 | 1 | 1 | 1 | 1 | 1 | 1 | 1 | 0  | 1  | 1  | 0          | 0 | 0 | 1 | 0 | 0 | 1 | 0 | 0 | 0  | 0  | 0  | 0 |
|            | 10 | 0          | 0 | 1 | 1 | 0 | 0 | 0 | 0 | 0 | 0  | 0  | 0  | 1          | 1 | 1 | 1 | 1 | 1 | 1 | 1 | 1 | 1  | 1  | 1  | 0          | 0 | 0 | 0 | 0 | 0 | 1 | 0 | 1 | 1  | 1  | 0  | 1 |
|            | 11 | 0          | 0 | 0 | 1 | 1 | 1 | 1 | 1 | 1 | 1  | 1  | 0  | 1          | 1 | 0 | 0 | 1 | 0 | 0 | 1 | 1 | 1  | 1  | 1  | 0          | 0 | 0 | 1 | 1 | 1 | 1 | 1 | 1 | 1  | 1  | 1  | 0 |
|            | 12 | 0          | 0 | 0 | 0 | 0 | 0 | 0 | 0 | 0 | 0  | 1  | 0  | 1          | 1 | 0 | 1 | 1 | 1 | 1 | 1 | 1 | 1  | 1  | 1  | 0          | 0 | 0 | 0 | 0 | 0 | 0 | 1 | 1 | 1  | 1  | 1  | 0 |

Replicate 4

|            |    | Hosts (T1) |   |   |   |   |   |   |   |   |    |    |    | Hosts (T4) |   |   |   |   |   |   |   |   |    |    |    | Hosts (T9) |   |   |   |   |   |   |   |   |    |    |    |
|------------|----|------------|---|---|---|---|---|---|---|---|----|----|----|------------|---|---|---|---|---|---|---|---|----|----|----|------------|---|---|---|---|---|---|---|---|----|----|----|
|            |    | 1          | 2 | 3 | 4 | 5 | 6 | 7 | 8 | 9 | 10 | 11 | 12 | 1          | 2 | 3 | 4 | 5 | 6 | 7 | 8 | 9 | 10 | 11 | 12 | 1          | 2 | 3 | 4 | 5 | 6 | 7 | 8 | 9 | 10 | 11 | 12 |
| Phage (T1) | 1  | 1          | 1 | 1 | 1 | 1 | 1 | 1 | 1 | 1 | 1  | 1  | 0  | 1          | 0 | 0 | 1 | 1 | 0 | 1 | 1 | 1 | 1  | 0  | 1  | 0          | 0 | 0 | 0 | 0 | 0 | 0 | 0 | 0 | 0  | 0  | 0  |
|            | 2  | 1          | 1 | 1 | 1 | 1 | 1 | 1 | 1 | 1 | 1  | 1  | 1  | 1          | 0 | 0 | 1 | 1 | 0 | 1 | 1 | 1 | 1  | 0  | 0  | 0          | 0 | 0 | 0 | 0 | 0 | 0 | 0 | 0 | 0  | 0  | 0  |
|            | 3  | 1          | 1 | 1 | 1 | 1 | 1 | 1 | 1 | 1 | 1  | 1  | 1  | 1          | 1 | 1 | 1 | 1 | 1 | 1 | 1 | 1 | 1  | 1  | 1  | 0          | 0 | 0 | 0 | 0 | 0 | 0 | 0 | 0 | 0  | 0  | 0  |
|            | 4  | 0          | 0 | 0 | 1 | 0 | 0 | 0 | 0 | 1 | 1  | 0  | 0  | 1          | 0 | 0 | 1 | 0 | 0 | 0 | 1 | 1 | 1  | 0  | 0  | 0          | 0 | 0 | 0 | 0 | 0 | 0 | 0 | 0 | 0  | 0  | 0  |
|            | 5  | 1          | 1 | 1 | 1 | 1 | 1 | 1 | 1 | 1 | 1  | 1  | 1  | 1          | 0 | 0 | 1 | 1 | 0 | 1 | 1 | 1 | 1  | 0  | 1  | 0          | 0 | 0 | 0 | 0 | 0 | 0 | 0 | 0 | 0  | 0  | 0  |
|            | 6  | 1          | 1 | 1 | 1 | 1 | 1 | 1 | 1 | 1 | 1  | 1  | 1  | 1          | 0 | 0 | 1 | 1 | 1 | 1 | 1 | 1 | 1  | 0  | 1  | 0          | 0 | 0 | 0 | 0 | 0 | 0 | 0 | 0 | 0  | 0  | 0  |
|            | 7  | 1          | 1 | 1 | 1 | 1 | 1 | 1 | 1 | 1 | 1  | 1  | 1  | 1          | 0 | 0 | 1 | 1 | 0 | 1 | 1 | 1 | 1  | 0  | 1  | 0          | 0 | 0 | 0 | 0 | 0 | 0 | 0 | 0 | 0  | 0  | 0  |
|            | 8  | 1          | 1 | 1 | 1 | 1 | 1 | 1 | 1 | 1 | 1  | 1  | 1  | 1          | 1 | 1 | 1 | 1 | 1 | 1 | 1 | 1 | 1  | 1  | 1  | 0          | 0 | 0 | 0 | 0 | 0 | 0 | 0 | 0 | 0  | 0  | 0  |
|            | 9  | 1          | 1 | 1 | 1 | 1 | 1 | 1 | 1 | 1 | 1  | 1  | 1  | 1          | 0 | 0 | 1 | 1 | 0 | 1 | 1 | 1 | 1  | 0  | 1  | 0          | 0 | 0 | 0 | 0 | 0 | 0 | 0 | 0 | 0  | 0  | 0  |
|            | 10 | 1          | 1 | 1 | 1 | 1 | 1 | 1 | 1 | 1 | 1  | 1  | 1  | 1          | 0 | 0 | 1 | 1 | 0 | 1 | 1 | 1 | 1  | 0  | 1  | 0          | 0 | 0 | 0 | 0 | 0 | 0 | 0 | 0 | 0  | 0  | 0  |
|            | 11 | 0          | 1 | 1 | 1 | 1 | 1 | 1 | 1 | 1 | 1  | 1  | 0  | 1          | 1 | 0 | 1 | 1 | 0 | 1 | 1 | 1 | 1  | 0  | 0  | 0          | 0 | 0 | 0 | 0 | 0 | 0 | 0 | 0 | 0  | 0  | 0  |
|            | 12 | 0          | 1 | 1 | 1 | 1 | 1 | 1 | 1 | 1 | 1  | 1  | 1  | 1          | 0 | 0 | 1 | 1 | 0 | 1 | 1 | 1 | 1  | 0  | 1  | 0          | 0 | 0 | 0 | 0 | 0 | 0 | 0 | 0 | 0  | 0  | 0  |
| Phage (T4) | 1  | 1          | 1 | 1 | 1 | 1 | 1 | 1 | 1 | 1 | 1  | 1  | 1  | 1          | 1 | 1 | 1 | 1 | 1 | 1 | 1 | 1 | 1  | 1  | 0  | 0          | 0 | 0 | 0 | 0 | 0 | 0 | 0 | 0 | 0  | 0  |    |
|            | 2  | 1          | 1 | 1 | 1 | 1 | 1 | 1 | 1 | 1 | 1  | 1  | 1  | 1          | 1 | 1 | 1 | 1 | 1 | 1 | 1 | 1 | 1  | 1  | 0  | 0          | 0 | 0 | 0 | 0 | 0 | 0 | 0 | 0 | 0  | 0  |    |
|            | 3  | 1          | 1 | 1 | 1 | 1 | 1 | 1 | 1 | 1 | 1  | 1  | 1  | 1          | 1 | 1 | 1 | 1 | 1 | 1 | 1 | 1 | 1  | 1  | 0  | 0          | 0 | 0 | 0 | 0 | 0 | 0 | 0 | 0 | 0  | 0  |    |
|            | 4  | 1          | 1 | 1 | 1 | 1 | 1 | 1 | 1 | 1 | 1  | 1  | 1  | 1          | 1 | 1 | 1 | 1 | 1 | 1 | 1 | 1 | 1  | 1  | 0  | 0          | 0 | 0 | 0 | 0 | 0 | 0 | 0 | 0 | 0  | 0  |    |
|            | 5  | 1          | 1 | 1 | 1 | 1 | 1 | 1 | 1 | 1 | 1  | 1  | 1  | 1          | 1 | 1 | 1 | 1 | 1 | 1 | 1 | 1 | 1  | 1  | 0  | 0          | 0 | 0 | 0 | 0 | 0 | 0 | 0 | 0 | 0  | 0  |    |
|            | 6  | 1          | 1 | 1 | 1 | 1 | 1 | 1 | 1 | 1 | 1  | 1  | 1  | 1          | 1 | 1 | 1 | 1 | 1 | 1 | 1 | 1 | 1  | 1  | 0  | 0          | 0 | 0 | 0 | 0 | 0 | 0 | 0 | 0 | 0  | 0  |    |
|            | 7  | 1          | 1 | 1 | 1 | 1 | 1 | 1 | 1 | 1 | 1  | 1  | 1  | 1          | 1 | 1 | 1 | 1 | 1 | 1 | 1 | 1 | 1  | 1  | 0  | 0          | 0 | 0 | 0 | 0 | 0 | 0 | 0 | 0 | 0  | 0  |    |
|            | 8  | 1          | 1 | 1 | 1 | 1 | 1 | 1 | 1 | 1 | 1  | 1  | 1  | 1          | 1 | 1 | 1 | 1 | 1 | 1 | 1 | 1 | 1  | 1  | 0  | 0          | 0 | 0 | 0 | 0 | 0 | 0 | 0 | 0 | 0  | 0  |    |
|            | 9  | 1          | 1 | 1 | 1 | 1 | 1 | 1 | 1 | 1 | 1  | 1  | 1  | 1          | 1 | 1 | 1 | 1 | 1 | 1 | 1 | 1 | 1  | 1  | 0  | 0          | 0 | 0 | 0 | 0 | 0 | 0 | 0 | 0 | 0  | 0  |    |
|            | 10 | 1          | 1 | 1 | 1 | 1 | 1 | 1 | 1 | 1 | 1  | 1  | 1  | 1          | 1 | 1 | 1 | 1 | 1 | 1 | 1 | 1 | 1  | 1  | 0  | 0          | 0 | 0 | 0 | 0 | 0 | 0 | 0 | 0 | 0  | 0  |    |
|            | 11 | 1          | 1 | 1 | 1 | 1 | 1 | 1 | 1 | 1 | 1  | 1  | 1  | 1          | 1 | 1 | 1 | 1 | 1 | 1 | 1 | 1 | 1  | 1  | 0  | 0          | 0 | 0 | 0 | 0 | 0 | 0 | 0 | 0 | 0  | 0  |    |
|            | 12 | 1          | 1 | 1 | 1 | 1 | 1 | 1 | 1 | 1 | 1  | 1  | 1  | 1          | 1 | 1 | 1 | 1 | 1 | 1 | 1 | 1 | 1  | 1  | 0  | 0          | 0 | 0 | 0 | 0 | 0 | 0 | 0 | 0 | 0  | 0  |    |
| Phage (T9) | 1  | 1          | 1 | 1 | 1 | 1 | 1 | 1 | 1 | 1 | 1  | 1  | 1  | 1          | 1 | 1 | 1 | 1 | 1 | 1 | 1 | 1 | 1  | 0  | 0  | 0          | 0 | 0 | 0 | 0 | 0 | 0 | 0 | 0 | 0  |    |    |
|            | 2  | 1          | 1 | 1 | 1 | 1 | 1 | 1 | 1 | 1 | 1  | 1  | 1  | 1          | 1 | 1 | 1 | 1 | 1 | 1 | 1 | 1 | 1  | 0  | 0  | 0          | 0 | 0 | 0 | 0 | 0 | 0 | 0 | 0 | 0  |    |    |
|            | 3  | 1          | 1 | 1 | 1 | 1 | 1 | 1 | 1 | 1 | 1  | 1  | 1  | 1          | 1 | 1 | 1 | 1 | 1 | 1 | 1 | 1 | 1  | 0  | 0  | 0          | 0 | 0 | 0 | 0 | 0 | 0 | 0 | 0 | 0  |    |    |
|            | 4  | 1          | 1 | 1 | 1 | 1 | 1 | 1 | 1 | 1 | 1  | 1  | 1  | 1          | 1 | 1 | 1 | 1 | 1 | 1 | 1 | 1 | 1  | 0  | 0  | 0          | 0 | 0 | 0 | 0 | 0 | 0 | 0 | 0 | 0  |    |    |
|            | 5  | 1          | 1 | 1 | 1 | 1 | 1 | 1 | 1 | 1 | 1  | 1  | 1  | 1          | 1 | 1 | 1 | 1 | 1 | 1 | 1 | 1 | 1  | 0  | 0  | 0          | 0 | 0 | 0 | 0 | 0 | 0 | 0 | 0 | 0  |    |    |
|            | 6  | 1          | 1 | 1 | 1 | 1 | 1 | 1 | 1 | 1 | 1  | 1  | 1  | 1          | 1 | 1 | 1 | 1 | 1 | 1 | 1 | 1 | 1  | 0  | 0  | 0          | 0 | 0 | 0 | 0 | 0 | 0 | 0 | 0 | 0  |    |    |
|            | 7  | 1          | 1 | 1 | 1 | 1 | 1 | 1 | 1 | 1 | 1  | 1  | 1  | 1          | 1 | 1 | 1 | 1 | 1 | 1 | 1 | 1 | 1  | 0  | 0  | 0          | 0 | 0 | 0 | 0 | 0 | 0 | 0 | 0 | 0  |    |    |
|            | 8  | 1          | 1 | 1 | 1 | 1 | 1 | 1 | 1 | 1 | 1  | 1  | 1  | 1          | 1 | 1 | 1 | 1 | 1 | 1 | 1 | 1 | 1  | 0  | 0  | 0          | 0 | 0 | 0 | 0 | 0 | 0 | 0 | 0 | 0  |    |    |
|            | 9  | 1          | 1 | 1 | 1 | 1 | 1 | 1 | 1 | 1 | 1  | 1  | 1  | 1          | 1 | 1 | 1 | 1 | 1 | 1 | 1 | 1 | 1  | 0  | 0  | 0          | 0 | 0 | 0 | 0 | 0 | 0 | 0 | 0 | 0  |    |    |
|            | 10 | 1          | 1 | 1 | 1 | 1 | 1 | 1 | 1 | 1 | 1  | 1  | 1  | 1          | 1 | 1 | 1 | 1 | 1 | 1 | 1 | 1 | 1  | 0  | 0  | 0          | 0 | 0 | 0 | 0 | 0 | 0 | 0 | 0 | 0  |    |    |
|            | 11 | 1          | 1 | 1 | 1 | 1 | 1 | 1 | 1 | 1 | 1  | 1  | 1  | 1          | 1 | 1 | 1 | 1 | 1 | 1 | 1 | 1 | 1  | 0  | 0  | 0          | 0 | 0 | 0 | 0 | 0 | 0 | 0 | 0 | 0  |    |    |
|            | 12 | 1          | 1 | 1 | 1 | 1 | 1 | 1 | 1 | 1 | 1  | 1  | 1  | 1          | 1 | 1 | 1 | 1 | 1 | 1 | 1 | 1 | 1  | 0  | 0  | 0          | 0 | 0 | 0 | 0 | 0 | 0 | 0 | 0 | 0  |    |    |

Replicate 5

|            |    | Hosts (T1) |   |   |   |   |   |   |   |   |    |    |    | Hosts (T4) |   |   |   |   |   |   |   |   |    |    |    | Hosts (T9) |   |   |   |   |   |   |   |   |    |    |    |
|------------|----|------------|---|---|---|---|---|---|---|---|----|----|----|------------|---|---|---|---|---|---|---|---|----|----|----|------------|---|---|---|---|---|---|---|---|----|----|----|
|            |    | 1          | 2 | 3 | 4 | 5 | 6 | 7 | 8 | 9 | 10 | 11 | 12 | 1          | 2 | 3 | 4 | 5 | 6 | 7 | 8 | 9 | 10 | 11 | 12 | 1          | 2 | 3 | 4 | 5 | 6 | 7 | 8 | 9 | 10 | 11 | 12 |
| Phage (T1) | 1  | 1          | 1 | 1 | 1 | 1 | 1 | 1 | 1 | 1 | 1  | 1  | 1  | 0          | 0 | 0 | 0 | 0 | 0 | 0 | 0 | 0 | 0  | 0  | 0  | 0          | 0 | 0 | 0 | 0 | 0 | 0 | 0 | 0 | 0  | 0  | 0  |
|            | 2  | 1          | 1 | 1 | 1 | 1 | 1 | 1 | 1 | 1 | 1  | 1  | 1  | 0          | 0 | 0 | 0 | 0 | 0 | 0 | 0 | 0 | 0  | 0  | 0  | 0          | 0 | 0 | 0 | 0 | 0 | 0 | 0 | 0 | 0  | 0  | 0  |
|            | 3  | 1          | 1 | 1 | 1 | 1 | 1 | 1 | 1 | 1 | 1  | 1  | 1  | 0          | 0 | 0 | 0 | 0 | 0 | 0 | 0 | 0 | 0  | 0  | 0  | 0          | 0 | 0 | 0 | 0 | 0 | 0 | 0 | 0 | 0  | 0  | 0  |
|            | 4  | 1          | 1 | 1 | 1 | 1 | 1 | 1 | 1 | 1 | 1  | 1  | 1  | 0          | 0 | 0 | 0 | 0 | 0 | 0 | 0 | 0 | 0  | 0  | 0  | 0          | 0 | 0 | 0 | 0 | 0 | 0 | 0 | 0 | 0  | 0  | 0  |
|            | 5  | 1          | 1 | 1 | 1 | 1 | 1 | 1 | 1 | 1 | 1  | 1  | 1  | 0          | 0 | 1 | 0 | 0 | 0 | 0 | 0 | 0 | 0  | 0  | 0  | 0          | 0 | 0 | 0 | 0 | 0 | 0 | 0 | 0 | 0  | 0  | 0  |
|            | 6  | 1          | 1 | 1 | 1 | 1 | 1 | 1 | 1 | 1 | 1  | 1  | 1  | 0          | 0 | 0 | 0 | 0 | 0 | 0 | 0 | 0 | 0  | 0  | 0  | 0          | 0 | 0 | 0 | 0 | 0 | 0 | 0 | 0 | 0  | 0  | 0  |
|            | 7  | 1          | 1 | 1 | 1 | 1 | 1 | 1 | 1 | 1 | 1  | 1  | 1  | 0          | 0 | 0 | 0 | 0 | 0 | 0 | 0 | 0 | 0  | 0  | 0  | 0          | 0 | 0 | 0 | 0 | 0 | 0 | 0 | 0 | 0  | 0  | 0  |
|            | 8  | 1          | 1 | 1 | 1 | 1 | 1 | 1 | 1 | 1 | 1  | 1  | 1  | 0          | 0 | 0 | 0 | 0 | 0 | 0 | 0 | 0 | 0  | 0  | 0  | 0          | 0 | 0 | 0 | 0 | 0 | 0 | 0 | 0 | 0  | 0  | 0  |
|            | 9  | 1          | 1 | 1 | 1 | 1 | 1 | 1 | 1 | 1 | 1  | 1  | 1  | 0          | 0 | 1 | 0 | 0 | 0 | 0 | 0 | 0 | 0  | 0  | 0  | 0          | 0 | 0 | 0 | 0 | 0 | 0 | 0 | 0 | 0  | 0  | 0  |
|            | 10 | 1          | 1 | 1 | 1 | 1 | 1 | 1 | 1 | 1 | 1  | 1  | 1  | 0          | 0 | 1 | 0 | 0 | 0 | 0 | 0 | 0 | 0  | 0  | 0  | 0          | 0 | 0 | 0 | 0 | 0 | 0 | 0 | 0 | 0  | 0  | 0  |
|            | 11 | 1          | 1 | 1 | 1 | 1 | 1 | 1 | 1 | 1 | 1  | 1  | 1  | 0          | 0 | 1 | 0 | 0 | 0 | 0 | 0 | 0 | 0  | 0  | 0  | 0          | 0 | 0 | 0 | 0 | 0 | 0 | 0 | 0 | 0  | 0  | 0  |
|            | 12 | 1          | 1 | 1 | 1 | 1 | 1 | 1 | 1 | 1 | 1  | 1  | 1  | 0          | 0 | 0 | 0 | 0 | 0 | 0 | 0 | 0 | 0  | 0  | 0  | 0          | 0 | 0 | 0 | 0 | 0 | 0 | 0 | 0 | 0  | 0  | 0  |
| Phage (T4) | 1  | 1          | 1 | 1 | 1 | 1 | 1 | 1 | 1 | 1 | 1  | 1  | 1  | 1          | 1 | 1 | 1 | 1 | 1 | 1 | 1 | 1 | 1  | 1  | 0  | 0          | 0 | 0 | 0 | 0 | 0 | 0 | 0 | 0 | 0  | 0  |    |
|            | 2  | 1          | 1 | 1 | 1 | 1 | 1 | 1 | 1 | 1 | 1  | 1  | 1  | 1          | 1 | 1 | 1 | 1 | 1 | 1 | 1 | 1 | 1  | 1  | 0  | 0          | 0 | 0 | 0 | 0 | 0 | 0 | 0 | 0 | 0  | 0  |    |
|            | 3  | 1          | 1 | 1 | 1 | 1 | 1 | 1 | 1 | 1 | 1  | 1  | 1  | 1          | 1 | 1 | 1 | 1 | 1 | 1 | 1 | 1 | 1  | 1  | 0  | 0          | 0 | 0 | 0 | 0 | 0 | 0 | 0 | 0 | 0  | 0  |    |
|            | 4  | 1          | 1 | 1 | 1 | 1 | 1 | 1 | 1 | 1 | 1  | 1  | 1  | 1          | 1 | 1 | 0 | 1 | 1 | 1 | 1 | 1 | 1  | 1  | 0  | 0          | 0 | 0 | 0 | 0 | 0 | 0 | 0 | 0 | 0  | 0  |    |
|            | 5  | 1          | 1 | 1 | 1 | 1 | 1 | 1 | 1 | 1 | 1  | 1  | 1  | 1          | 1 | 1 | 1 | 1 | 1 | 1 | 0 | 1 | 1  | 1  | 0  | 0          | 0 | 0 | 0 | 0 | 0 | 0 | 0 | 0 | 0  | 0  |    |
|            | 6  | 1          | 1 | 1 | 1 | 1 | 1 | 1 | 1 | 1 | 1  | 1  | 1  | 1          | 1 | 1 | 1 | 1 | 1 | 1 | 0 | 1 | 1  | 1  | 0  | 0          | 0 | 0 | 0 | 0 | 0 | 0 | 0 | 0 | 0  | 0  |    |
|            | 7  | 1          | 1 | 1 | 1 | 1 | 1 | 1 | 1 | 1 | 1  | 1  | 1  | 1          | 1 | 1 | 1 | 1 | 1 | 1 | 1 | 1 | 1  | 1  | 0  | 0          | 0 | 0 | 0 | 0 | 0 | 0 | 0 | 0 | 0  | 0  |    |
|            | 8  | 1          | 1 | 1 | 1 | 1 | 1 | 1 | 1 | 1 | 1  | 1  | 1  | 1          | 1 | 1 | 1 | 1 | 1 | 1 | 1 | 1 | 1  | 1  | 0  | 0          | 0 | 0 | 0 | 0 | 0 | 0 | 0 | 0 | 0  | 0  |    |
|            | 9  | 1          | 1 | 1 | 1 | 1 | 1 | 1 | 1 | 1 | 1  | 1  | 1  | 1          | 1 | 1 | 1 | 1 | 1 | 1 | 0 | 1 | 1  | 1  | 0  | 0          | 0 | 0 | 0 | 0 | 0 | 0 | 0 | 0 | 0  | 0  |    |
|            | 10 | 1          | 1 | 1 | 1 | 1 | 1 | 1 | 1 | 1 | 1  | 1  | 1  | 1          | 1 | 1 | 1 | 1 | 1 | 1 | 1 | 1 | 1  | 1  | 0  | 0          | 0 | 0 | 0 | 0 | 0 | 0 | 0 | 0 | 0  | 0  |    |
|            | 11 | 1          | 1 | 1 | 1 | 1 | 1 | 1 | 1 | 1 | 1  | 1  | 1  | 1          | 1 | 1 | 1 | 1 | 1 | 1 | 1 | 1 | 1  | 1  | 0  | 0          | 0 | 0 | 0 | 0 | 0 | 0 | 0 | 0 | 0  | 0  |    |
|            | 12 | 1          | 1 | 1 | 1 | 1 | 1 | 1 | 1 | 1 | 1  | 1  | 1  | 1          | 1 | 1 | 1 | 1 | 1 | 1 | 1 | 1 | 1  | 1  | 0  | 0          | 0 | 0 | 0 | 0 | 0 | 0 | 0 | 0 | 0  | 0  |    |
| Phage (T9) | 1  | 0          | 0 | 1 | 1 | 1 | 1 | 1 | 1 | 1 | 1  | 1  | 0  | 1          | 1 | 1 | 0 | 0 | 1 | 1 | 1 | 1 | 1  | 0  | 0  | 0          | 0 | 0 | 0 | 0 | 0 | 0 | 0 | 0 | 0  | 0  |    |
|            | 2  | 0          | 1 | 1 | 1 | 1 | 1 | 1 | 1 | 1 | 1  | 0  | 0  | 0          | 1 | 1 | 0 | 0 | 1 | 1 | 1 | 0 | 1  | 0  | 0  | 0          | 0 | 0 | 0 | 0 | 0 | 0 | 0 | 0 | 0  | 0  |    |
|            | 3  | 1          | 0 | 1 | 1 | 1 | 1 | 1 | 1 | 1 | 1  | 1  | 0  | 0          | 0 | 1 | 0 | 0 | 1 | 0 | 0 | 0 | 0  | 0  | 0  | 0          | 0 | 0 | 0 | 0 | 0 | 0 | 0 | 0 | 0  | 0  |    |
|            | 4  | 0          | 1 | 1 | 1 | 1 | 1 | 1 | 1 | 1 | 1  | 0  | 0  | 1          | 0 | 1 | 1 | 0 | 0 | 0 | 0 | 0 | 0  | 0  | 0  | 0          | 0 | 0 | 0 | 0 | 0 | 0 | 0 | 0 | 0  | 0  |    |
|            | 5  | 0          | 1 | 1 | 1 | 1 | 1 | 1 | 1 | 1 | 1  | 1  | 0  | 1          | 1 | 1 | 0 | 0 | 1 | 0 | 0 | 0 | 0  | 1  | 0  | 0          | 0 | 0 | 0 | 0 | 0 | 0 | 0 | 0 | 0  | 0  |    |
|            | 6  | 0          | 1 | 0 | 0 | 1 | 1 | 1 | 1 | 1 | 1  | 0  | 0  | 1          | 1 | 1 | 1 | 0 | 1 | 0 | 0 | 0 | 0  | 1  | 0  | 0          | 0 | 0 | 0 | 0 | 0 | 0 | 0 | 0 | 0  | 0  |    |
|            | 7  | 1          | 0 | 0 | 0 | 1 | 1 | 1 | 1 | 1 | 1  | 0  | 1  | 0          | 1 | 0 | 1 | 1 | 0 | 0 | 0 | 0 | 0  | 0  | 0  | 0          | 0 | 0 | 0 | 0 | 0 | 0 | 0 | 0 | 0  | 0  |    |
|            | 8  | 0          | 0 | 0 | 0 | 0 | 0 | 0 | 0 | 0 | 0  | 0  | 0  | 0          | 0 | 0 | 0 | 0 | 0 | 0 | 0 | 0 | 0  | 0  | 0  | 0          | 0 | 0 | 0 | 0 | 0 | 0 | 0 | 0 | 0  | 0  |    |
|            | 9  | 1          | 1 | 1 | 1 | 1 | 1 | 1 | 1 | 1 | 1  | 1  | 1  | 1          | 1 | 1 | 1 | 1 | 1 | 1 | 1 | 1 | 1  | 1  | 0  | 0          | 0 | 0 | 0 | 0 | 0 | 0 | 0 | 0 | 0  | 0  |    |
|            | 10 | 1          | 0 | 0 | 1 | 1 | 1 | 1 | 1 | 1 | 1  | 0  | 0  | 1          | 1 | 1 | 1 | 1 | 1 | 0 | 0 | 0 | 1  | 0  | 0  | 0          | 0 | 0 | 0 | 0 | 0 | 0 | 0 | 0 | 0  | 0  |    |
|            | 11 | 1          | 0 | 0 | 0 | 0 | 0 | 0 | 0 | 1 | 0  | 1  | 0  | 0          | 0 | 0 | 0 | 0 | 1 | 1 | 0 | 0 | 0  | 0  | 0  | 0          | 0 | 0 | 0 | 0 | 0 | 0 | 0 | 0 | 0  | 0  |    |
|            | 12 | 0          | 0 | 1 | 0 | 0 | 0 | 0 | 0 | 0 | 0  | 1  | 0  | 0          | 0 | 1 | 0 | 0 | 0 | 1 | 0 | 0 | 0  | 0  | 0  | 0          | 0 | 0 | 0 | 0 | 0 | 0 | 0 | 0 | 0  | 0  |    |

Replicate 6



|            |    | Hosts (T1) |   |   |   |   |   |   |   |   |    |    |    | Hosts (T4) |   |   |   |   |   |   |   |   |    |    |    | Hosts (T9) |   |   |   |   |   |   |   |   |    |    |    |
|------------|----|------------|---|---|---|---|---|---|---|---|----|----|----|------------|---|---|---|---|---|---|---|---|----|----|----|------------|---|---|---|---|---|---|---|---|----|----|----|
|            |    | 1          | 2 | 3 | 4 | 5 | 6 | 7 | 8 | 9 | 10 | 11 | 12 | 1          | 2 | 3 | 4 | 5 | 6 | 7 | 8 | 9 | 10 | 11 | 12 | 1          | 2 | 3 | 4 | 5 | 6 | 7 | 8 | 9 | 10 | 11 | 12 |
| Phage (T1) | 1  | 1          | 1 | 1 | 1 | 1 | 1 | 1 | 1 | 1 | 1  | 1  | 1  | 1          | 1 | 1 | 1 | 1 | 1 | 1 | 1 | 1 | 1  | 1  | 1  | 0          | 0 | 0 | 0 | 0 | 0 | 0 | 0 | 0 | 0  | 0  | 0  |
|            | 2  | 1          | 1 | 1 | 1 | 1 | 1 | 1 | 1 | 1 | 1  | 1  | 1  | 1          | 1 | 1 | 1 | 1 | 1 | 1 | 1 | 1 | 1  | 1  | 1  | 0          | 0 | 0 | 0 | 0 | 0 | 0 | 0 | 0 | 0  | 0  | 0  |
|            | 3  | 1          | 1 | 1 | 1 | 1 | 1 | 1 | 1 | 1 | 1  | 1  | 1  | 1          | 1 | 1 | 1 | 1 | 1 | 1 | 1 | 1 | 1  | 1  | 1  | 0          | 0 | 0 | 0 | 0 | 0 | 0 | 0 | 0 | 0  | 0  | 0  |
|            | 4  | 1          | 1 | 1 | 1 | 1 | 1 | 1 | 1 | 1 | 1  | 1  | 1  | 1          | 1 | 1 | 1 | 1 | 1 | 1 | 1 | 1 | 1  | 1  | 1  | 0          | 0 | 0 | 0 | 0 | 0 | 0 | 0 | 0 | 0  | 0  | 0  |
|            | 5  | 1          | 1 | 1 | 1 | 1 | 1 | 1 | 1 | 1 | 1  | 1  | 1  | 1          | 1 | 1 | 1 | 1 | 1 | 1 | 1 | 1 | 1  | 1  | 1  | 0          | 0 | 0 | 0 | 0 | 0 | 0 | 0 | 0 | 0  | 0  | 0  |
|            | 6  | 1          | 1 | 1 | 1 | 1 | 1 | 1 | 1 | 1 | 1  | 1  | 1  | 1          | 1 | 1 | 1 | 1 | 1 | 1 | 1 | 1 | 1  | 1  | 1  | 0          | 0 | 0 | 0 | 0 | 0 | 0 | 0 | 0 | 0  | 0  | 0  |
|            | 7  | 1          | 1 | 1 | 1 | 1 | 1 | 1 | 1 | 1 | 1  | 1  | 1  | 1          | 1 | 1 | 1 | 1 | 1 | 1 | 1 | 1 | 1  | 1  | 1  | 0          | 0 | 0 | 0 | 0 | 0 | 0 | 0 | 0 | 0  | 0  | 0  |
|            | 8  | 1          | 1 | 1 | 1 | 1 | 1 | 1 | 1 | 1 | 1  | 1  | 1  | 1          | 1 | 1 | 1 | 1 | 1 | 1 | 1 | 1 | 1  | 1  | 1  | 0          | 0 | 0 | 0 | 0 | 0 | 0 | 0 | 0 | 0  | 0  | 0  |
|            | 9  | 1          | 1 | 1 | 1 | 1 | 1 | 1 | 1 | 1 | 1  | 1  | 1  | 1          | 1 | 1 | 1 | 1 | 1 | 1 | 1 | 1 | 1  | 1  | 1  | 0          | 0 | 0 | 0 | 0 | 0 | 0 | 0 | 0 | 0  | 0  | 0  |
|            | 10 | 1          | 1 | 1 | 1 | 1 | 1 | 1 | 1 | 1 | 1  | 1  | 1  | 1          | 1 | 1 | 1 | 1 | 1 | 1 | 1 | 1 | 1  | 1  | 1  | 0          | 0 | 0 | 0 | 0 | 0 | 0 | 0 | 0 | 0  | 0  | 0  |
|            | 11 | 1          | 1 | 1 | 1 | 1 | 1 | 1 | 1 | 1 | 1  | 1  | 1  | 1          | 1 | 1 | 1 | 1 | 1 | 1 | 1 | 1 | 1  | 1  | 1  | 0          | 0 | 0 | 0 | 0 | 0 | 0 | 0 | 0 | 0  | 0  | 0  |
|            | 12 | 1          | 1 | 1 | 1 | 1 | 1 | 1 | 1 | 1 | 1  | 1  | 1  | 1          | 1 | 1 | 1 | 1 | 1 | 1 | 1 | 1 | 1  | 1  | 1  | 0          | 0 | 0 | 0 | 0 | 0 | 0 | 0 | 0 | 0  | 0  | 0  |
| Phage (T4) | 1  | 1          | 1 | 1 | 1 | 1 | 1 | 1 | 1 | 1 | 1  | 1  | 1  | 1          | 1 | 1 | 1 | 1 | 1 | 1 | 1 | 1 | 1  | 1  | 0  | 0          | 1 | 1 | 1 | 1 | 1 | 0 | 1 | 1 | 1  | 1  |    |
|            | 2  | 1          | 1 | 1 | 1 | 1 | 1 | 1 | 1 | 1 | 1  | 1  | 1  | 1          | 1 | 1 | 1 | 1 | 1 | 1 | 1 | 1 | 1  | 1  | 0  | 0          | 0 | 1 | 0 | 0 | 0 | 0 | 0 | 1 | 0  | 1  |    |
|            | 3  | 1          | 1 | 1 | 1 | 1 | 1 | 1 | 1 | 1 | 1  | 1  | 1  | 1          | 1 | 1 | 1 | 1 | 1 | 1 | 1 | 1 | 1  | 1  | 0  | 0          | 0 | 0 | 0 | 0 | 1 | 0 | 0 | 0 | 0  | 0  |    |
|            | 4  | 1          | 1 | 1 | 1 | 1 | 1 | 1 | 1 | 1 | 1  | 1  | 1  | 1          | 1 | 1 | 1 | 1 | 1 | 1 | 1 | 1 | 1  | 1  | 0  | 0          | 0 | 0 | 0 | 0 | 0 | 0 | 0 | 0 | 1  | 1  |    |
|            | 5  | 1          | 1 | 1 | 1 | 1 | 1 | 1 | 1 | 1 | 1  | 1  | 1  | 1          | 1 | 1 | 1 | 1 | 1 | 1 | 1 | 1 | 1  | 1  | 0  | 0          | 0 | 0 | 1 | 0 | 1 | 0 | 0 | 1 | 0  | 1  |    |
|            | 6  | 1          | 1 | 1 | 1 | 1 | 1 | 1 | 1 | 1 | 1  | 1  | 1  | 1          | 1 | 1 | 1 | 1 | 1 | 1 | 1 | 1 | 1  | 1  | 0  | 0          | 1 | 1 | 1 | 1 | 1 | 0 | 0 | 0 | 1  | 1  |    |
|            | 7  | 1          | 1 | 1 | 1 | 1 | 1 | 1 | 1 | 1 | 1  | 1  | 1  | 1          | 1 | 1 | 1 | 1 | 1 | 1 | 1 | 1 | 1  | 1  | 1  | 0          | 1 | 0 | 0 | 0 | 0 | 0 | 0 | 0 | 1  | 0  |    |
|            | 8  | 1          | 1 | 1 | 1 | 1 | 1 | 1 | 1 | 1 | 1  | 1  | 1  | 1          | 1 | 1 | 1 | 1 | 1 | 1 | 1 | 1 | 1  | 1  | 0  | 0          | 0 | 0 | 0 | 0 | 0 | 0 | 0 | 0 | 0  | 0  |    |
|            | 9  | 1          | 1 | 1 | 1 | 1 | 1 | 1 | 1 | 1 | 1  | 1  | 1  | 1          | 1 | 1 | 1 | 1 | 1 | 1 | 1 | 1 | 1  | 1  | 0  | 0          | 0 | 0 | 0 | 1 | 0 | 0 | 0 | 0 | 0  | 1  |    |
|            | 10 | 1          | 1 | 1 | 1 | 1 | 1 | 1 | 1 | 1 | 1  | 1  | 1  | 1          | 1 | 1 | 1 | 1 | 1 | 1 | 1 | 1 | 1  | 1  | 1  | 0          | 0 | 1 | 0 | 0 | 1 | 0 | 0 | 1 | 0  | 1  |    |
|            | 11 | 1          | 1 | 1 | 1 | 1 | 1 | 1 | 1 | 1 | 1  | 1  | 1  | 1          | 1 | 1 | 1 | 1 | 1 | 1 | 1 | 1 | 1  | 1  | 1  | 0          | 0 | 0 | 0 | 0 | 0 | 0 | 0 | 0 | 0  | 1  |    |
|            | 12 | 1          | 1 | 1 | 1 | 1 | 1 | 1 | 1 | 1 | 1  | 1  | 1  | 1          | 1 | 1 | 1 | 1 | 1 | 1 | 1 | 1 | 1  | 1  | 1  | 0          | 0 | 1 | 0 | 0 | 1 | 0 | 0 | 1 | 0  | 1  |    |
| Phage (T9) | 1  | 1          | 1 | 1 | 1 | 1 | 1 | 1 | 1 | 1 | 1  | 1  | 1  | 1          | 1 | 1 | 1 | 1 | 1 | 1 | 1 | 1 | 1  | 1  | 1  | 1          | 1 | 1 | 1 | 1 | 1 | 1 | 1 | 1 | 1  | 1  |    |
|            | 2  | 1          | 1 | 1 | 1 | 1 | 1 | 1 | 1 | 1 | 1  | 1  | 1  | 1          | 1 | 1 | 1 | 1 | 1 | 1 | 1 | 1 | 1  | 1  | 1  | 1          | 1 | 1 | 1 | 1 | 1 | 1 | 1 | 1 | 1  | 1  |    |
|            | 3  | 1          | 1 | 1 | 1 | 1 | 1 | 1 | 1 | 1 | 1  | 1  | 1  | 1          | 1 | 1 | 1 | 1 | 1 | 1 | 1 | 1 | 1  | 1  | 1  | 1          | 1 | 1 | 1 | 1 | 1 | 1 | 1 | 1 | 1  | 1  |    |
|            | 4  | 1          | 1 | 1 | 1 | 1 | 1 | 1 | 1 | 1 | 1  | 1  | 1  | 1          | 1 | 1 | 1 | 1 | 1 | 1 | 1 | 1 | 1  | 1  | 1  | 1          | 1 | 1 | 1 | 1 | 1 | 1 | 1 | 1 | 1  | 1  |    |
|            | 5  | 1          | 1 | 1 | 1 | 1 | 1 | 1 | 1 | 1 | 1  | 1  | 1  | 1          | 1 | 1 | 1 | 1 | 1 | 1 | 1 | 1 | 1  | 1  | 1  | 1          | 1 | 1 | 1 | 1 | 1 | 1 | 1 | 1 | 1  | 1  |    |
|            | 6  | 1          | 1 | 1 | 1 | 1 | 1 | 1 | 1 | 1 | 1  | 1  | 1  | 1          | 1 | 1 | 1 | 1 | 1 | 1 | 1 | 1 | 1  | 1  | 1  | 1          | 1 | 1 | 1 | 1 | 1 | 1 | 1 | 1 | 1  | 1  |    |
|            | 7  | 1          | 1 | 1 | 1 | 1 | 1 | 1 | 1 | 1 | 1  | 1  | 1  | 1          | 1 | 1 | 1 | 1 | 1 | 1 | 1 | 1 | 1  | 1  | 1  | 1          | 1 | 1 | 1 | 1 | 1 | 1 | 1 | 1 | 1  | 1  |    |
|            | 8  | 1          | 1 | 1 | 1 | 1 | 1 | 1 | 1 | 1 | 1  | 1  | 1  | 1          | 1 | 1 | 1 | 1 | 1 | 1 | 1 | 1 | 1  | 1  | 1  | 1          | 1 | 1 | 1 | 1 | 1 | 1 | 1 | 1 | 1  | 1  |    |
|            | 9  | 1          | 1 | 1 | 1 | 1 | 1 | 1 | 1 | 1 | 1  | 1  | 1  | 1          | 1 | 1 | 1 | 1 | 1 | 1 | 1 | 1 | 1  | 1  | 1  | 1          | 1 | 1 | 1 | 1 | 1 | 1 | 1 | 1 | 1  | 1  |    |
|            | 10 | 1          | 1 | 1 | 1 | 1 | 1 | 1 | 1 | 1 | 1  | 1  | 1  | 1          | 1 | 1 | 1 | 1 | 1 | 1 | 1 | 1 | 1  | 1  | 1  | 1          | 1 | 1 | 1 | 1 | 1 | 1 | 1 | 1 | 1  | 1  |    |
|            | 11 | 1          | 1 | 1 | 1 | 1 | 1 | 1 | 1 | 1 | 1  | 1  | 1  | 1          | 1 | 1 | 1 | 1 | 1 | 1 | 1 | 1 | 1  | 1  | 1  | 1          | 1 | 1 | 1 | 1 | 1 | 1 | 1 | 1 | 1  | 1  |    |
|            | 12 | 1          | 1 | 1 | 1 | 1 | 1 | 1 | 1 | 1 | 1  | 1  | 1  | 1          | 1 | 1 | 1 | 1 | 1 | 1 | 1 | 1 | 1  | 1  | 1  | 1          | 1 | 1 | 1 | 1 | 1 | 1 | 1 | 1 | 1  | 1  |    |

Replicate 8
